# Supplementary material for: Genetic influences on the shape of brain ventricular and subcortical structures
Source: bioRxiv or medRxiv preprint supplement (doi:10.1101/2022.09.26.22279691), 2022-09-27
Supplement: Supplementary file [file media-2.pdf]

1  
2  
3  
4  
5  
6  
7  
8  
9  
10  
11  
12  
13  
14  
15  
16  
17  
18  
19  
20  
21  
22  
23  
24  
25  
26  
27  
28  
29  
30  
31  
32  
33  
34  
35  
36  
37  
38  
39  
40  
41

## Supplementary Information for

### **Genetic influences on the shape of brain ventricular and subcortical structures**

**This PDF file includes:**

Supplementary Note

**Other Supplementary Materials for this manuscript include the following:**

Supplementary Figures S1 to S42 (available in a PDF file)

Supplementary Tables S1 to S14 (.xlsx) (available in a zip file)

## 1 **Supplementary Note**

### 2 **Shape analysis pipeline**

3 Using the FMRIB Software Library (FSL)<sup>1</sup> (<https://fsl.fmrib.ox.ac.uk/>) and Statistical  
4 Parametric Mapping (SPM) (<http://www.fil.ion.ucl.ac.uk/spm/>) packages, structural  
5 MRIs were linearly registered into a standard brain space (MNI152). Seven subcortical  
6 (the amygdala, hippocampus, nucleus accumbens, caudate nucleus, putamen,  
7 pallidum, and thalamus) and lateral ventricular structures were segmented<sup>2-4</sup>. Surface  
8 meshes were constructed based on the subcortical and ventricular segmentations with  
9 a topology-preserving level set method<sup>5</sup> and the marching cube algorithm<sup>6</sup>,  
10 parameterized with refined triangular meshes using the topological optimization  
11 algorithm<sup>7</sup> and holomorphic flow segmentation method<sup>8</sup>. Then the images were  
12 registered to a common rectangular grid template using the surface fluid registration  
13 algorithm<sup>9</sup>. Multiple morphometry features were extracted, including the multivariate  
14 tensor-based morphometry (mTBM), radial distance (RD)<sup>8,10</sup>, determinant of the  
15 Jacobian matrix, and minimum and maximum eigenvalues of the Jacobian matrix<sup>8</sup>. The  
16 overall average and top principal components (PCs) of 7 features for 8 subcortical and  
17 ventricular regions and 7 hippocampal subfields were extracted. This pipeline is  
18 publicly available at [https://www.nitrc.org/frs/?group\\_id=1461](https://www.nitrc.org/frs/?group_id=1461). The detailed steps in  
19 our applications were summarized as follows:

- 20  
21 1. Individual MRI scans were linearly registered into the MNI152 standard space to  
22 remove the effects of individual brain size. Automated subcortical segmentations  
23 (the amygdala, hippocampus, nucleus accumbens, caudate nucleus, putamen,  
24 pallidum, and thalamus) from the registered MR images were conducted using the  
25 FIRST with default parameters in FSL<sup>3</sup>. Since the lateral ventricles had complex  
26 geometric structure (i.e., a “multiple-arm” shapes), a different segmentation  
27 strategy was applied. Specifically, the cerebrospinal fluid (CSF) was first segmented  
28 from the registered individual MR images using the SPM8 packages  
29 (<http://www.fil.ion.ucl.ac.uk/spm/>). A group-wise CSF template was then created  
30 by applying the geodesic shooting algorithm<sup>11</sup>, which learned the minimal  
31 deformation from all the individual’s CSF segmentations. The binary ventricular  
32 template was extracted by mapping a probability ventricular mask, i.e., the  
33 automatic lateral ventricle delineation (ALVIN) binary mask<sup>11</sup>, onto this template.  
34 The ventricular template boundaries were visually inspected. The deformation  
35 matrices from the estimation of CSF template were then used to wrap the  
36 ventricular template back to the individual space to generate the individual  
37 ventricular segmentations<sup>4</sup>.
- 38 2. The bilateral subcortical and ventricular surfaces were modeled with a topology-  
39 preserving level set method<sup>5</sup>. Based on the voxel-wise binary segmentation results,  
40 the marching cubes algorithm<sup>6</sup> was applied to generate the triangular surface  
41 meshes. Progressive mesh<sup>12</sup> and loop subdivision<sup>13</sup> methods were applied to refine  
42 the generated meshes and down-sample each surface mesh to a consistent  
43 number of vertices for subcortical and ventricular structures. Before geometric

1 analysis of these ventricular surfaces, a two-step mesh smoothing method was  
2 applied to remove noise and topologically irregular structures<sup>14</sup>.

3 3. A common geometrical surface structure was defined so that all surfaces can be  
4 consistently parameterized<sup>15</sup>. To generate a planar surface conformal  
5 parameterization for a closed subcortical surface, the topological optimization  
6 algorithm<sup>7</sup> was applied to convert each kind of subcortical surfaces to a tube-like  
7 surface with two open consistent boundaries across subjects. The holomorphic 1-  
8 form method<sup>16</sup> induced conformal grids which demonstrated the angle preserving  
9 property on the tube-like subcortical surfaces. Due to the naturally occurring 3-  
10 horn shape, the whole ventricular surface was cut into three sub-structures by the  
11 holomorphic 1-forms segmentation method<sup>8</sup>.

12 4. Each individual parameterized subcortical or sub-ventricular surface was  
13 registered to a common template surface. With conformal representations<sup>9</sup>, a 3D  
14 subcortical or sub-ventricular surface can be realized as a 2D image so that general  
15 image registration algorithms can be applied. A surface fluid registration algorithm  
16 was carried out and an inverse-consistent surface registration framework was  
17 added to increase robustness<sup>9,17,18</sup>.

18 5. After surface parameterization and registration, we computed vertex-wise features  
19 with multivariate morphometry statistics, including vertex-wise morphometry  
20 features along the surface tangent direction (such as the mTBM) and normal  
21 direction (i.e., RD)<sup>8,19,20</sup>. We also calculated three more vertex-wise statistics in the  
22 standard space, derived from the Jacobian matrix measuring local area differences:  
23 the min/max eigenvalues of the Jacobian matrix and the determinant of Jacobian  
24 matrix<sup>8</sup>.

25 6. We calculated the average of each shape feature map for each of the subcortical  
26 and ventricular regions. We picked out the outlier subjects for each feature map if  
27 the average shape feature was greater than five times the median absolute  
28 deviation (MAD) from the population. In addition, we generated snapshots for  
29 each surface of those outlier subjects, with landmarks drawn in blue line in the  
30 individual space to show the same location in the standard space. We manually  
31 checked if the landmarks indicated the same location for each subject to evaluate  
32 the surface registration. We removed those images with bad surface registration  
33 quality (**Fig. S42**).

34 7. We extracted the top 5 PCs of each feature map for each of the subcortical and  
35 ventricular regions. Specifically, for each feature map, we reshaped the vertex-wise  
36 UKB phase 3 data (average  $n \approx 16,000$  subjects) into an  $n \times p$  data matrix  $A$ ,  
37 where  $p$  is the number of vertices. Top PC scores and PC basis functions for UKB  
38 phase 3 data were extracted through singular value decomposition of  $A$ . For more  
39 details on how to extract PCs from images, please refer to Zhao, et al.<sup>21</sup>.

40 8. The UKB phases 1 and 2 datasets (average  $n \approx 20,000$  subjects) were used to  
41 evaluate the robustness of PC scores in Step 7. For each feature map, the original  
42 PC scores and PC basis functions for UKB phases 1 and 2 datasets were extracted  
43 in the same procedure as Step 7. Meanwhile, the projected PC scores will be  
44 extracted by projecting the UKB phases 1 and 2 data onto the PC basis functions

1 obtained from the UKB phase 3 data in Step 7. The ICC between the original PC  
2 scores and the projected PC scores were calculated to evaluate the reproducibility  
3 of PC scores based on the two different PC bases.

- 4 9. We segmented the hippocampus surface-based rectangular grid template into 12  
5 subfields (<https://surfer.nmr.mgh.harvard.edu/fswiki/HippocampalSubfields>) by  
6 applying the subfield segmentation algorithm in FreeSurfer v6.0<sup>20</sup> to the MNI152  
7 brain atlas. The average across each of the cornu ammonis 1 (CA1), CA3, fimbria,  
8 hippocampus-amygdala-transition-area (HATA), hippocampal tail, presubiculum,  
9 and subiculum subfields for each feature map was extracted. Other 5 subfields  
10 were excluded because their surfaces were out of view.

## 11 REFERENCES

- 12 1. Jenkinson, M., Beckmann, C.F., Behrens, T.E., Woolrich, M.W. & Smith, S.M. Fsl.  
13 *Neuroimage* **62**, 782-790 (2012).  
14 2. Paquette, N. *et al.* Ventricular shape and relative position abnormalities in preterm  
15 neonates. *NeuroImage: Clinical* **15**, 483-493 (2017).  
16 3. Patenaude, B., Smith, S.M., Kennedy, D.N. & Jenkinson, M. A Bayesian model of shape  
17 and appearance for subcortical brain segmentation. *Neuroimage* **56**, 907-922 (2011).  
18 4. Dong, Q. *et al.* Applying surface-based morphometry to study ventricular abnormalities  
19 of cognitively unimpaired subjects prior to clinically significant memory decline.  
20 *NeuroImage: Clinical* **27**, 102338 (2020).  
21 5. Han, X., Xu, C. & Prince, J.L. A topology preserving level set method for geometric  
22 deformable models. *IEEE Transactions on Pattern Analysis and Machine Intelligence* **25**,  
23 755-768 (2003).  
24 6. Lorensen, W.E. & Cline, H.E. Marching cubes: A high resolution 3D surface construction  
25 algorithm. *ACM siggraph computer graphics* **21**, 163-169 (1987).  
26 7. Wang, Y. *et al.* Brain surface conformal parameterization with the Ricci flow. *IEEE*  
27 *transactions on medical imaging* **31**, 251-264 (2011).  
28 8. Wang, Y. *et al.* Multivariate tensor-based morphometry on surfaces: application to  
29 mapping ventricular abnormalities in HIV/AIDS. *NeuroImage* **49**, 2141-2157 (2010).  
30 9. Shi, J., Thompson, P.M., Gutman, B., Wang, Y. & Initiative, A.s.D.N. Surface fluid  
31 registration of conformal representation: Application to detect disease burden and  
32 genetic influence on hippocampus. *NeuroImage* **78**, 111-134 (2013).  
33 10. Wang, Y. *et al.* Surface-based TBM boosts power to detect disease effects on the brain:  
34 an N= 804 ADNI study. *Neuroimage* **56**, 1993-2010 (2011).  
35 11. Kempton, M.J. *et al.* A comprehensive testing protocol for MRI neuroanatomical  
36 segmentation techniques: evaluation of a novel lateral ventricle segmentation method.  
37 *Neuroimage* **58**, 1051-1059 (2011).  
38 12. Hoppe, H. Progressive meshes. in *Proceedings of the 23rd annual conference on*  
39 *Computer graphics and interactive techniques* 99-108 (1996).  
40 13. Loop, C. Smooth subdivision surfaces based on triangles. (1987).  
41 14. Yi, H.-A. *et al.* Relation between subcortical grey matter atrophy and conversion from  
42 mild cognitive impairment to Alzheimer's disease. *Journal of Neurology, Neurosurgery*  
43 *& Psychiatry* **87**, 425-432 (2016).  
44

- 1 15. Fischl, B. FreeSurfer. *Neuroimage* **62**, 774-781 (2012).
- 2 16. Wang, Y. *et al.* Brain surface conformal parameterization using Riemann surface  
3 structure. *IEEE Transactions on Medical Imaging* **26**, 853-865 (2007).
- 4 17. D'agostino, E., Maes, F., Vandermeulen, D. & Suetens, P. A viscous fluid model for  
5 multimodal non-rigid image registration using mutual information. *Medical image  
6 analysis* **7**, 565-575 (2003).
- 7 18. Bro-Nielsen, M. & Gramkow, C. Fast fluid registration of medical images. in *International  
8 conference on visualization in biomedical computing* 265-276 (Springer, 1996).
- 9 19. Wang, Y. *et al.* Applying tensor-based morphometry to parametric surfaces can improve  
10 MRI-based disease diagnosis. *Neuroimage* **74**, 209-230 (2013).
- 11 20. Dong, Q. *et al.* Applying surface-based hippocampal morphometry to study APOE-E4  
12 allele dose effects in cognitively unimpaired subjects. *NeuroImage: Clinical* **22**, 101744  
13 (2019).
- 14 21. Zhao, B. *et al.* Common genetic variation influencing human white matter  
15 microstructure. *Science* **372**(2021).

16  
17
